# Supplementary material for: Transcriptional bypass of regioisomeric ethylated thymidine lesions by T7 RNA polymerase and human RNA polymerase II
Source: PubMed Central journal article supplement — Nucleic Acids Res. 2014 Nov 17;42(22):13706–13. doi: 10.1093/nar/gku1183 (PMC4267633; doi:10.1093/nar/gku1183), 2014-11-17

**Supplementary Materials**

for

**“Transcriptional Bypass of Regioisomeric Ethylated Thymidine Lesions by T7  
RNA Polymerase and Human RNA Polymerase II”**

by

Changjun You<sup>1</sup>, Pengcheng Wang<sup>2</sup>, Xiaoxia Dai<sup>1</sup>, and Yinsheng Wang<sup>1,2,\*</sup>

<sup>1</sup>Department of Chemistry and <sup>2</sup>Environmental Toxicology Graduate Program, University of  
California, Riverside, California 92521-0403

## Figure Legends

**Supplementary Figure 1.** Representative high-resolution “ultra zoom-scan” ESI-MS results showing the detection of the  $[M-3H]^{3-}$  ions of restriction fragments of interest arising from the T7 RNAP-mediated transcription of *N3-* (a), *O*<sup>2</sup>- (b) or *O*<sup>4</sup>-EtdT-bearing substrates (c). ‘13mer A’ represents the non-mutagenic product, i.e., d(AATTATAGCACGC), whereas ‘13mer C’, ‘13mer G’ and ‘13mer T’ designate the corresponding products carrying an A→C, A→G or A→T mutation opposite the lesion site, i.e., d(AATTATAGCCGC), d(AATTATAGCGCGC) and d(AATTATAGCTCGC), respectively.

**Supplementary Figure 2.** Representative LC-MS/MS for monitoring the 13-mer restriction fragments of interest with A→C (a), A→T (b) or A→G (c) mutation opposite the original *N3*-EtdT site. Shown in (a), (b) and (c) are the product-ion spectra of the ESI-produced  $[M-3H]^{3-}$  ions ( $m/z$  1304.6, 1309.6 and 1317.9, respectively) of the 13-mer DNA fragments, i.e., d(AATTATAGCMCGC), where M is C, T and G, respectively. Shown in the insets are schemes summarizing the observed  $[a_n - \text{Base}]$  and  $w_n$  fragment ions [nomenclature follows that described previously. *J. Am. Soc. Mass Spectrom.* 3, 60-70 (1992)].

**Supplementary Figure 3.** PAGE analysis for determining the effects of *N3*-EtdT, *O*<sup>2</sup>-EtdT and *O*<sup>4</sup>-EtdT on DNA transcription in XPA-deficient (XP12RO) and XPA-complemented (GM15876A) cells. (a) Representative gel images showing the NcoI-SfaNI-treated restriction fragments of interest. The restriction fragment arising from the competitor vector, i.e., d(CATGGCGATATGCTAT), is designated as ‘16mer-Comp’; ‘13mer-C’, ‘13mer-A’, ‘13mer-G’, and ‘13mer-T’ represent the standard ODN d(CATGGCGNGCTAT), where N is C, A, G, T, respectively. (b) Representative gel images showing the MluCI-Cac8I-treated restriction fragments of interest. ‘10mer-C’, ‘10mer-A’, ‘10mer-G’, and ‘10mer-T’ represent the standard ODN d(AATTATAGCM), where M is C, A, G, T, respectively.

**Supplementary Figure 4.** Real-time RT-PCR analysis for monitoring the siRNA-mediated knockdown of *CSB* (a) or *XPC* (b) in human 293T cells. *GAPDH* gene was used as a control for real-time RT-PCR analysis. The PCR data represent the mean and standard error of results from three separate experiments.

**Supplementary Figure 5.** PAGE analysis for determining the effects of *N3*-EtdT, *O*<sup>2</sup>-EtdT and *O*<sup>4</sup>-EtdT on DNA transcription in 293T cells treated with *CSB* or *XPC* siRNAs. (a) Representative gel images showing the restriction fragments of interest after NcoI and SfaNI cleavage. The restriction fragment arising from the competitor vector, i.e., d(CATGGCGATATGCTAT), is designated as ‘16mer-Comp’; ‘13mer-C’, ‘13mer-A’, ‘13mer-G’, and ‘13mer-T’ represent the standard ODN d(CATGGCGNGCTAT), where N is C, A, G, T, respectively. (b) Representative gel images showing the MluCI-Cac8I-treated restriction fragments of interest. ‘10mer-C’, ‘10mer-A’, ‘10mer-G’, and ‘10mer-T’ represent the standard ODN d(AATTATAGCM), where M is C, A, G, T, respectively.

# Supplementary Figure 1

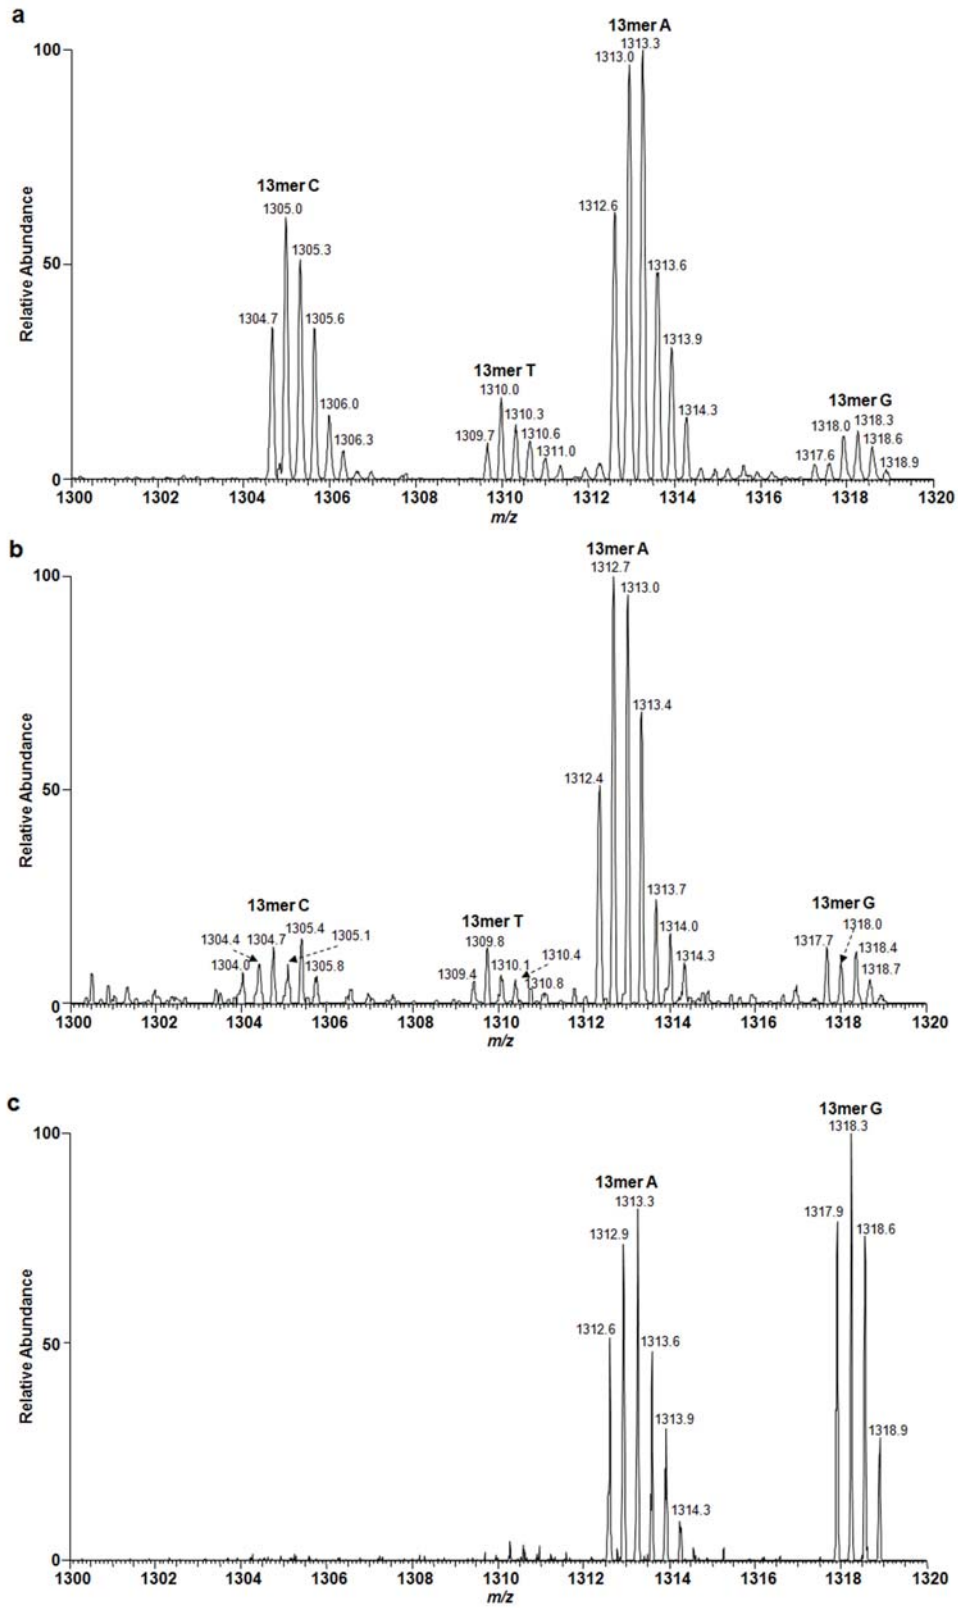

Supplementary Figure 2

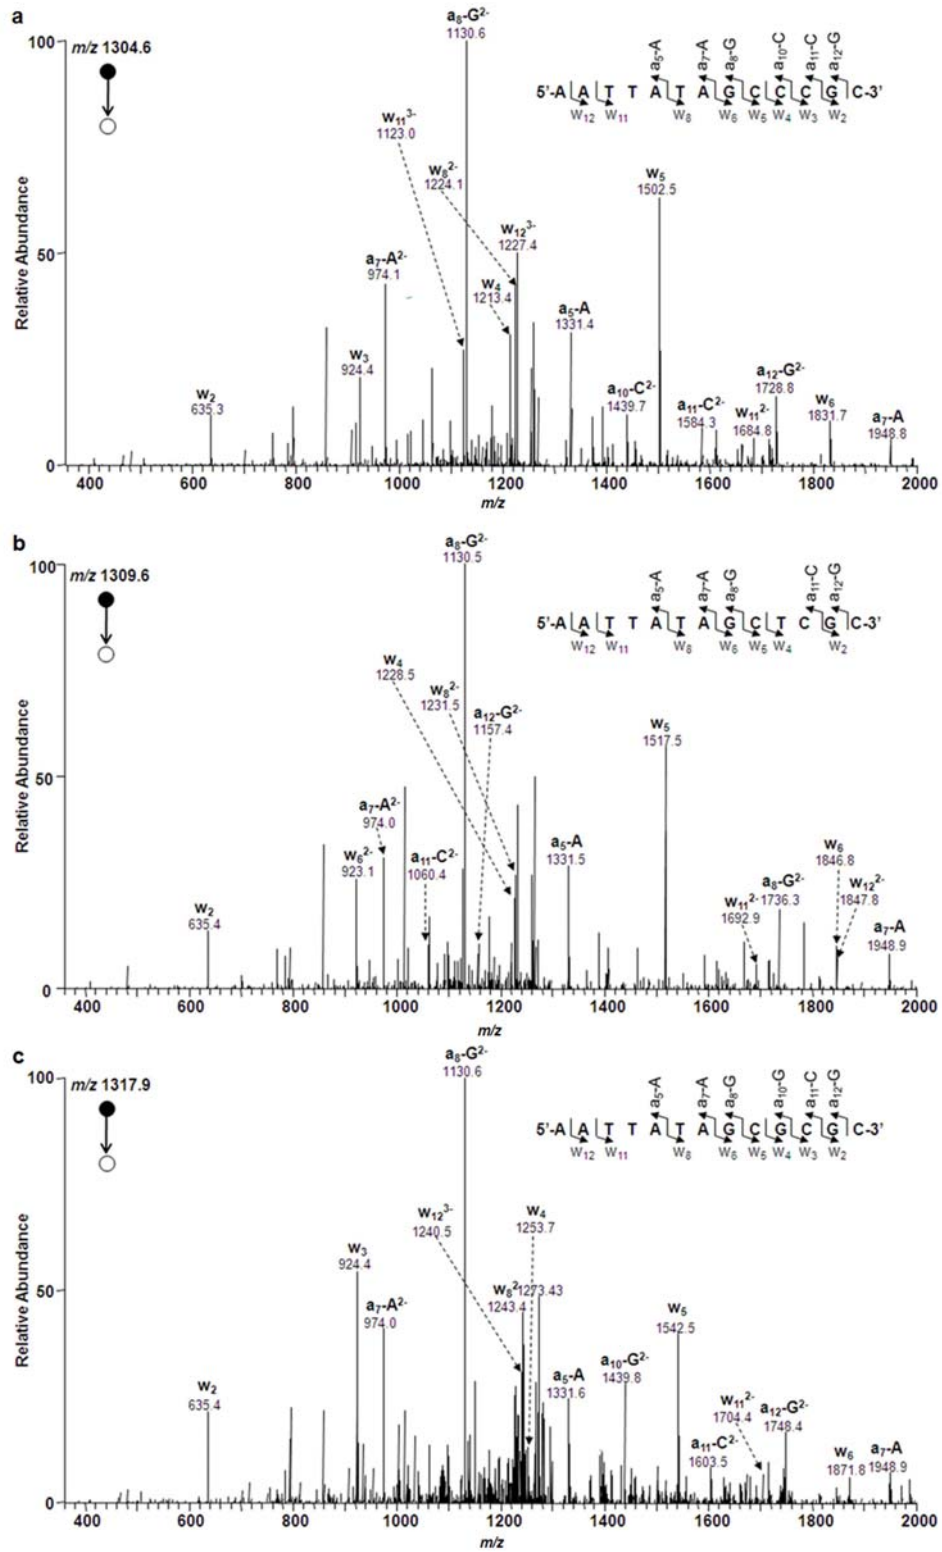

### Supplementary Figure 3

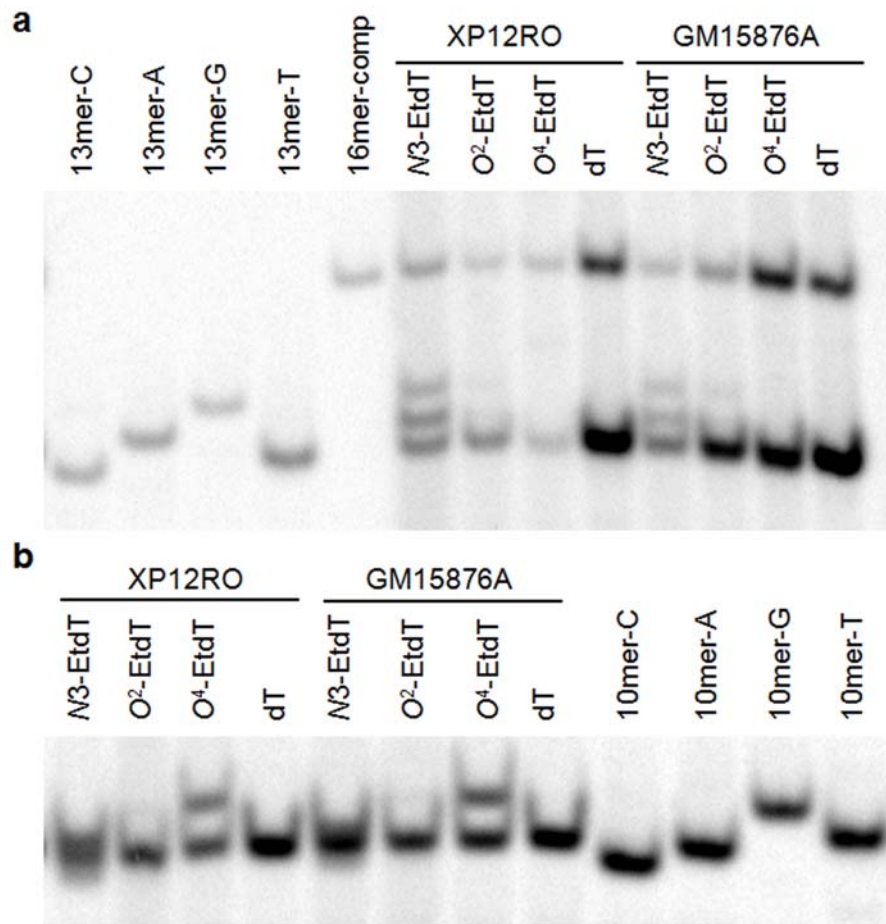

Supplementary Figure 4

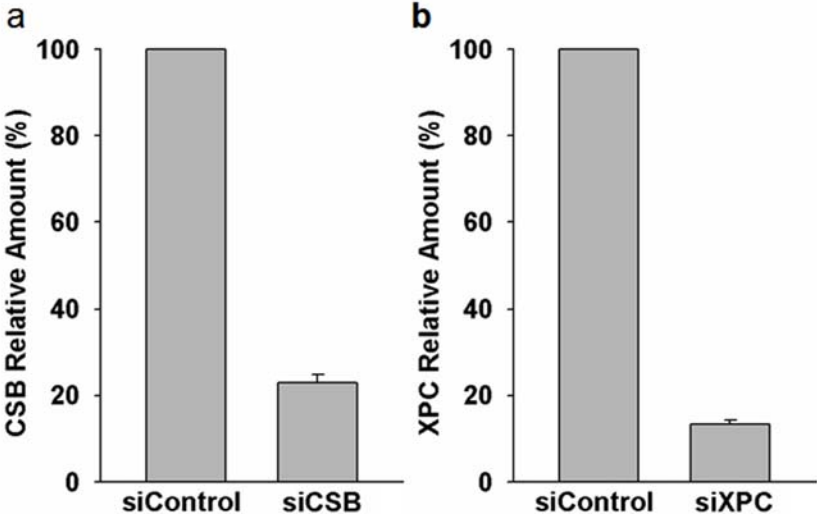

Supplementary Figure 5

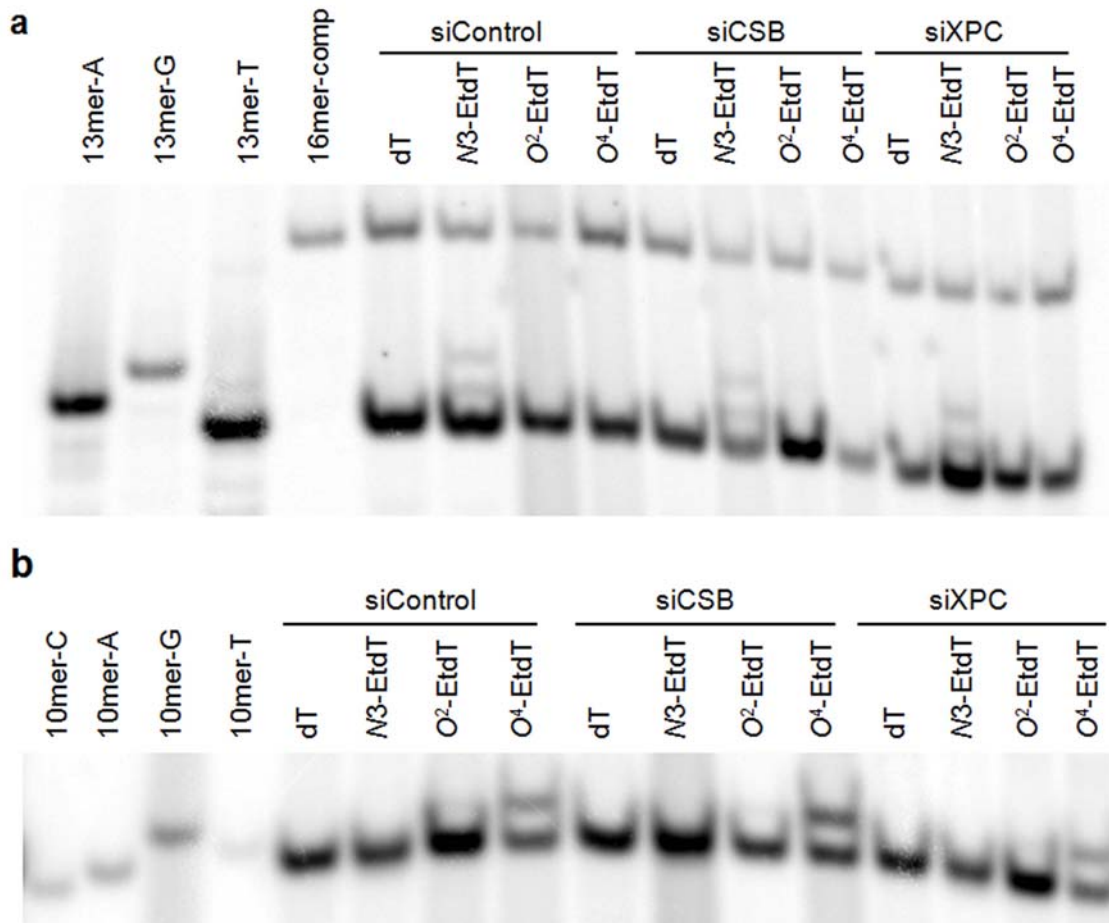

Supplement: supp_gku1183_nar-02767-m-2014-File005.pdf [file supp_gku1183_nar-02767-m-2014-File005.pdf]
